# Supplementary material for: Implementing a digital communication assistance tool to collect the medical history of refugee patients: DICTUM Friedland - an action-oriented mixed methods study protocol
Source: Springer Nature journal article supplement (doi:10.1186/s12913-019-3928-1), 2019-02-06
Supplement: MOESM1 [file 16446700]

## Fragen an Patienten

Tab. 1 Fragen an Patient\*in direkt nach der Anamneseerhebung

|                                                                                                                                                                                                                                                                     |
|---------------------------------------------------------------------------------------------------------------------------------------------------------------------------------------------------------------------------------------------------------------------|
| <p><b>a)</b> Konnten Sie Ihre wesentlichen Beschwerden in dem Programm eingeben?<br/>ja (1), teilweise (3), nein (2)</p>                                                                                                                                            |
| <p><b>b)</b> Konnten Sie das Programm auf dem Tablet gut bedienen?<br/>ja (1), teilweise (3), nein (2)</p>                                                                                                                                                          |
| <p><b>c)</b> Haben Sie das Programm für sich benutzt oder für jemand anderen?<br/>- Ich habe das Programm für meine eigenen Beschwerden benutzt (1)<br/>- Ich habe das Programm für ein Kind bedient (2)<br/>- ich habe das Programm für Angehörige bedient (3)</p> |
| <p><b>d)</b> Haben Sie eine Schule besucht? (1) ja (2) nein</p>                                                                                                                                                                                                     |
| <p><b>e)</b> Falls ja, wieviel Jahre? _____</p>                                                                                                                                                                                                                     |

Tab. 2 Fragen an Patient\*in, wenn sie die Medikamente abholen kommen

|                                                                                                                                                                                                                                                                    |
|--------------------------------------------------------------------------------------------------------------------------------------------------------------------------------------------------------------------------------------------------------------------|
| <p><b>a)</b> Waren Sie als Patient*in, als Angehörige*r oder als Elternteil eines erkrankten Kindes in der medizinischen Sprechstunde?<br/>- als Patient*in (1)<br/>- als Elternteil (2)<br/>- als Angehörige*r/Bekannte*r (3)</p>                                 |
| <p><b>b)</b> Haben Sie die Kommunikationshilfe auf dem Tablet-PC verwendet?<br/>(1) ja (2) nein</p>                                                                                                                                                                |
| <p><b>c)</b> Hat die Ärztin oder Arzt Ihr Anliegen verstanden?<br/>voll und ganz (1), weitgehend (2), teilweise (3), kaum (4), gar nicht (5)</p>                                                                                                                   |
| <p><b>d)</b> Konnte die Ärztin oder Arzt Ihnen das weitere Vorgehen verständlich erklären?<br/>voll und ganz (1), weitgehend (2), teilweise (3), kaum (4), gar nicht (5)</p>                                                                                       |
| <p>(nur wenn „ja“ bei Frage <b>b</b>)<br/><b>e)</b> Wie denken Sie: hat das Programm das gegenseitige Verständnis beeinflusst?<br/>deutlich verbessert (1) etwas verbessert (2) gar nicht beeinflusst (3) etwas verschlechtert (4) deutlich verschlechtert (5)</p> |

## Patients' Questions

Tab. 1 Patients' questions directly after collecting the medical history

|                                                                                                                                                                                                                                                               |
|---------------------------------------------------------------------------------------------------------------------------------------------------------------------------------------------------------------------------------------------------------------|
| <p><b>a)</b> Could you give your main complaints through this program?<br/>yes (1), partially (3), no (2)</p>                                                                                                                                                 |
| <p><b>b)</b> Could you use the program on the Tablet easy and well?<br/>yes (1), partially (3), no (2)</p>                                                                                                                                                    |
| <p><b>c)</b> Did you use the program for yourself or on behalf of somebody else?<br/>- I have used the program for my own complaints (1)<br/>- I have used the program on behalf of a child (2)<br/>- I have used the program on behalf of a relative (3)</p> |
| <p><b>d)</b> Have you been previously to a school? (1) yes (2) no</p>                                                                                                                                                                                         |
| <p><b>e)</b> In case yes, for how many years? _____</p>                                                                                                                                                                                                       |

Tab. 2 Patients' questions, when they come to pick up the medications

|                                                                                                                                                                                                                                                                |
|----------------------------------------------------------------------------------------------------------------------------------------------------------------------------------------------------------------------------------------------------------------|
| <p><b>a)</b> Have you been at the consultation as a patient, as a relative or as a parent on behalf of a child?<br/>- as a patient (1)<br/>- as a parent (2)<br/>- as a relative / acquainted (3)</p>                                                          |
| <p><b>b)</b> Did you use the communication assistance tool on the Tablet-PC?<br/>(1) yes (2) no</p>                                                                                                                                                            |
| <p><b>c)</b> Did the doctor understand your concern?<br/>Fully (1), to a great extent (2), partially (3), rarely (4), not at all (5)</p>                                                                                                                       |
| <p><b>d)</b> Could the doctor explain to you further procedures clearly?<br/><br/>Fully (1), to a great extent (2), partially (3), rarely (4), not at all (5)</p>                                                                                              |
| <p>(Just in case of <b>yes</b> by question <b>b</b>)<br/><b>e)</b> How do you think the program has influenced the mutual understanding?<br/>notably improved (1) slightly improved (2) no influence at all (3) slightly worsened (4) notably worsened (5)</p> |
