# Supplementary material for: Implementing a digital communication assistance tool to collect the medical history of refugee patients: DICTUM Friedland - an action-oriented mixed methods study protocol
Source: Springer Nature journal article supplement (doi:10.1186/s12913-019-3928-1), 2019-02-06
Supplement: MOESM2 [file 16446700]

**Meine Meinung** zur gerade stattgefundenen Konsultation:

ID  
Etikett

**1. Haben Sie das Anliegen des Patienten verstanden?**

voll und      gar nicht  
ganz

**2. Hat der Patient Ihre vorgebrachten Empfehlungen (z.B. zur Medikamenteneinnahme) verstanden?**

voll und      gar nicht  
ganz

**3. War ein Laiendolmetscher anwesend?** Wurde durch einen Angehörigen (Laiendolmetscher) übersetzt? (z.B. englisch, deutsch)

ja   nein

(bitte bei jeder Konsultation ausfüllen)

Nur, falls eine ausgedruckte Synopse vorliegt:

**4. Wie hat der Ausdruck die Konsultation beeinflusst?**

verbessert      verschlechtert

**5. Widersprechen sich Ausdruck und Ihr klinischer Eindruck vom Patienten?**

ja    nein

**Vielen Dank für Ihre Unterstützung!**

DICTUM-Projekt  
Dr. Evelyn Kleinert  
Tel. 0551-39-65302 od. -22638  
[evelyn.kleinert@med.uni-goettingen.de](mailto:evelyn.kleinert@med.uni-goettingen.de)

UNIVERSITÄTSMEDIZIN   
GÖTTINGEN  
ALLGEMEINMEDIZIN

**My opinion on the current held consultation :**

ID  
Label

**1. Did you understand the concerns of the patients ?**

fully      not at all

**2. Does the patient understand your recommendations (e.g: taking medications)?**

fully      not at all

**3. Was there a lay interpreter present?** Was the translation performed by a relative of the patient ( lay interpreter) ? (e.g. English, German)

Yes   No

(Please to be filled in at every consultation)

Only , if there is a printed synopsis (Report):

**4. How did the printed report influence the consultation?**

improved      worsened

**5. Is there a conflict between the printed report and your clinical impression of the patient ?**

Yes    No

**Thank you very much for your support**

DICTUM-Projekt  
Dr. Evelyn Kleinert, DICTUM-Projekt  
Tel. 0551-39-65302 od. -22638  
[evelyn.kleinert@med.uni-goettingen.de](mailto:evelyn.kleinert@med.uni-goettingen.de)

UNIVERSITÄTSMEDIZIN   
GÖTTINGEN  
ALLGEMEINMEDIZIN
