# Supplementary material for: Implementing a digital communication assistance tool to collect the medical history of refugee patients: DICTUM Friedland - an action-oriented mixed methods study protocol
Source: Springer Nature journal article supplement (doi:10.1186/s12913-019-3928-1), 2019-02-06
Supplement: MOESM3 [file 16446700]

Patient ID

#1700651

Date and time of the consultation

01.01.2018 - 16:16

Main symptoms

- 1 **Brustschmerz**
- 2 **Beinschmerz**
- 3 **Herzklopfen**

Chest pain

Leg pain

palpitations

Important notes;  
Please be attention

**CAVE:**  
**Schwangerschaft möglich**

**Allergien:** Information on Allergy

Pollen  
Tierhaare  
Medikamente

Name In this field, an etiquet with basic information on the patient will be added

Vorname

Geb.-datum

[Patientenetikett]

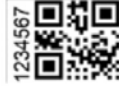

Vegetative medical history & Risk Factors

**Vegetative u. Risiko-Anamnese:**

Angaben vorhanden zu  
Fieber  
Schlafstörungen  
Gewichtsveränderg.  
Nachtschweiß

♀ 37 J.  
ca. 160 cm  
ca. 60 - 70 kg

Subj. Beschwerdedruck:

7 /10

Subjective estimation of symptoms strength

Drugs  
Alcohol  
Smoking

Drogen  
Alkohol  
Rauchen

Basic Information: Age, height and weight.

Chosen language

Sprachwahl:  
Englisch

**1 Brustschmerz/ Herzbeschwerden** detailed questions and answers of chest pain

Der Patient/ die Patientin gibt an, **seit 2 Tagen** Schmerzen zu haben. Eine ärztliche Untersuchung ist bislang **nicht** erfolgt. Die Schmerzen sind seit dem Beginn **stärker** geworden.

Wie empfinden Sie die Schmerzen?  
**andauernd/ mit Herzstolpern**

Strahlt der Schmerz aus?  
**Rücken**

In welcher Situation treten die Beschwerden auf?  
**(andauernd/ atemabhängig/**

Wie stark sind die Schmerzen?  
**mittel**

Wo? (s. Abbildung Lokalisierung)

Liegen zusätzliche Symptome vor?  
**Luftnot/ Unterschenkelanschwellung**

Besteht eine Herzerkrankung?  
**nein**

Hatten Sie schonmal einen Herzinfarkt?  
**nein**

Hatten Sie bereits eine Herzkatheteruntersuchung?  
**noch nie**

Gibt es ein auslösendes Ereignis?  
**Unfall**

Haben Sie eine Zuckererkrankung/Diabetes mellitus?  
**nein**

Liegt eine Fettstoffwechselstörung vor?/erhöhte

Cholesterinwerte/Blutfette?  
**nein**

Haben Sie Bluthochdruck?  
**nein**

Sind Sie übergewichtig?  
**nein**

**2 Beinschmerz** detailed questions on leg pain

Wie lange bestehen die Beschwerden?

**1 Woche**

Was trifft auf Ihren Schmerz zu?  
**anhaltend**

Wieviel Meter können Sie ohne Beschwerden gehen?

**uneingeschränkt**

Wo? (s. Abbildung Lokalisierung)

Sind außerdem aufgetreten?

**Unfall/ Beinschwellung/ Luftnot/ Herzrhythmus-Störungen**

Haben Sie Probleme, das Wasser oder Stuhl zu halten?  
**nein**

**3 Herzklopfen** detailed questions on palpitations

Seit wann haben Sie die Beschwerden?

**1 Tag**

Sind die Beschwerden neu aufgetreten?

**ja**

Was spüren Sie?
